# Supplementary material for: Transcriptomic analysis of genetically defined autism candidate genes reveals common mechanisms of action
Source: PubMed Central journal article supplement (PMC4176301; doi:10.1186/2040-2392-4-45), 2013-11-15
Supplement: 2040-2392-4-45-S5.pdf [file 2040-2392-4-45-S5.pdf]

Supplementary table 4 - Hypotheses common in ≥ 3 experiments

|                                                  | blank  | MeCP2 | Mef2a | Mef2d | NLGN1 | NLGN3 | Shank3 | Fmr1 | Pten | number of experiments |
|--------------------------------------------------|--------|-------|-------|-------|-------|-------|--------|------|------|-----------------------|
| hypothesis name                                  |        |       |       |       |       |       |        |      |      |                       |
| STAT4 (-)                                        | blue   | red   | red   | red   | red   | red   | red    | red  | blue | 7                     |
| SOCS2 (+)                                        | blue   | red   | red   | red   | red   | red   | red    | red  | blue | 7                     |
| potassium chloride (-)                           | blue   | red   | red   | red   | red   | red   | red    | red  | blue | 7                     |
| PARP1 (-)                                        | blue   | red   | red   | red   | red   | red   | red    | red  | blue | 7                     |
| NLRP12 (-)                                       | blue   | red   | red   | red   | red   | red   | red    | red  | blue | 7                     |
| IL2 (-)                                          | yellow | blue  | red   | red   | red   | red   | red    | red  | blue | 7                     |
| cancer (-)                                       | blue   | red   | red   | red   | red   | red   | red    | red  | blue | 7                     |
| bucladesine (-)                                  | yellow | blue  | red   | red   | red   | red   | red    | blue | red  | 7                     |
| response to UV (-)                               | blue   | red   | red   | red   | red   | red   | red    | red  | blue | 6                     |
| response to hypoxia (-)                          | yellow | blue  | red   | red   | red   | red   | blue   | red  | blue | 6                     |
| PTH (-)                                          | blue   | red   | red   | red   | red   | blue  | red    | red  | red  | 6                     |
| propranolol (+)                                  | blue   | red   | red   | red   | red   | red   | red    | blue | blue | 6                     |
| PROK1 (-)                                        | blue   | red   | red   | red   | red   | red   | red    | red  | blue | 6                     |
| phorbol esters (-)                               | blue   | red   | red   | red   | red   | red   | red    | red  | blue | 6                     |
| norepinephrine (-)                               | blue   | red   | red   | red   | red   | red   | red    | red  | blue | 6                     |
| kainic acid (-)                                  | yellow | blue  | red   | red   | red   | red   | red    | red  | blue | 6                     |
| isoproterenol (-)                                | blue   | red   | red   | red   | red   | red   | red    | red  | blue | 6                     |
| Ischemia (-)                                     | blue   | red   | red   | red   | red   | red   | red    | red  | blue | 6                     |
| HDAC1 (+)                                        | blue   | red   | red   | red   | red   | red   | red    | red  | blue | 6                     |
| GDNF (-)                                         | blue   | red   | red   | red   | red   | red   | red    | red  | blue | 6                     |
| experimental stroke (-)                          | blue   | red   | red   | red   | red   | red   | blue   | red  | blue | 6                     |
| ESR1 (-)                                         | blue   | red   | red   | red   | red   | red   | red    | red  | blue | 6                     |
| CSF1 (-)                                         | blue   | red   | red   | red   | red   | blue  | red    | red  | blue | 6                     |
| CRH (-)                                          | blue   | red   | red   | red   | red   | red   | red    | red  | blue | 6                     |
| CHR-2797 (-)                                     | blue   | red   | red   | red   | red   | red   | blue   | red  | blue | 6                     |
| cerivastatin (-)                                 | blue   | red   | red   | red   | blue  | red   | red    | red  | blue | 6                     |
| camptothecin (-)                                 | blue   | red   | red   | red   | red   | red   | blue   | red  | blue | 6                     |
| 1-methyl-4-phenyl-1,2,3,6-tetrahydropyridine (-) | yellow | blue  | red   | red   | red   | red   | red    | blue | blue | 6                     |
| 1-alpha, 25-dihydroxy vitamin D3 (-)             | blue   | red   | red   | red   | red   | red   | red    | blue | blue | 6                     |
| U0126 (+)                                        | blue   | red   | red   | red   | red   | red   | blue   | red  | blue | 5                     |
| tributylin (-)                                   | blue   | red   | red   | red   | red   | red   | blue   | red  | blue | 5                     |
| TP53 (-)                                         | blue   | red   | red   | red   | red   | red   | blue   | red  | blue | 5                     |
| T113242 (-)                                      | blue   | red   | red   | red   | red   | red   | blue   | red  | blue | 5                     |
| STAT3 (-)                                        | blue   | red   | red   | red   | blue  | red   | red    | red  | blue | 5                     |
| SMAD3 (-)                                        | blue   | red   | red   | red   | red   | red   | blue   | red  | blue | 5                     |
| SB203580 (+)                                     | blue   | red   | red   | red   | blue  | red   | red    | red  | blue | 5                     |
| RHO (+)                                          | blue   | red   | red   | blue  | red   | blue  | red    | red  | blue | 5                     |
| Response to stress (-)                           | blue   | red   | red   | red   | red   | red   | blue   | red  | blue | 5                     |
| poly rI:rC-RNA (-)                               | blue   | red   | red   | red   | red   | red   | blue   | red  | blue | 5                     |
| Pkc family (-)                                   | blue   | red   | red   | red   | red   | blue  | red    | red  | blue | 5                     |
| PGR (-)                                          | blue   | red   | red   | blue  | red   | red   | red    | red  | blue | 5                     |
| paclitaxel (-)                                   | blue   | red   | red   | red   | red   | blue  | red    | red  | blue | 5                     |
| okadaic acid (-)                                 | blue   | red   | red   | red   | blue  | red   | red    | red  | blue | 5                     |
| NGF (-)                                          | yellow | blue  | red   | red   | red   | red   | red    | blue | blue | 5                     |
| N-Ac-Leu-Leu-norleucinal (+)                     | blue   | red   | red   | red   | red   | red   | red    | red  | blue | 5                     |
| N-acetyl sphingosine (-)                         | blue   | red   | red   | red   | red   | red   | red    | red  | blue | 5                     |
| mycophenolic acid (-)                            | blue   | red   | red   | red   | red   | red   | red    | red  | blue | 5                     |
| microtubule polymerization (+)                   | blue   | red   | red   | red   | red   | red   | red    | red  | blue | 5                     |
| methyl methanesulfonate (-)                      | blue   | red   | red   | red   | red   | red   | blue   | red  | blue | 5                     |
| Low Density Lipoprotein (-)                      | blue   | red   | red   | blue  | red   | red   | red    | red  | blue | 5                     |
| Laminar shear stress (-)                         | blue   | red   | red   | red   | red   | red   | red    | red  | blue | 5                     |
| IL6 (-)                                          | blue   | red   | red   | red   | red   | red   | red    | red  | blue | 5                     |
| IL27 (-)                                         | blue   | red   | red   | blue  | red   | red   | red    | red  | blue | 5                     |
| IL1 family (-)                                   | blue   | red   | red   | red   | red   | red   | blue   | red  | blue | 5                     |
| Huntington's disease (+)                         | blue   | red   | red   | red   | blue  | red   | red    | red  | blue | 5                     |
| HGF (-)                                          | blue   | red   | red   | red   | red   | red   | blue   | red  | blue | 5                     |

Supplementary table 4 - Hypotheses common in ≥ 3 experiments (cont.)

|                                                      |  |  |  |  |  |  |  |  |  |   |
|------------------------------------------------------|--|--|--|--|--|--|--|--|--|---|
| GRP (-)                                              |  |  |  |  |  |  |  |  |  | 5 |
| GNRHR (-)                                            |  |  |  |  |  |  |  |  |  | 5 |
| GNRH1 (-)                                            |  |  |  |  |  |  |  |  |  | 5 |
| EPHB1 (-)                                            |  |  |  |  |  |  |  |  |  | 5 |
| EGF (-)                                              |  |  |  |  |  |  |  |  |  | 5 |
| doxorubicin (-)                                      |  |  |  |  |  |  |  |  |  | 5 |
| CYP2C18 (-)                                          |  |  |  |  |  |  |  |  |  | 5 |
| cyclic GMP (-)                                       |  |  |  |  |  |  |  |  |  | 5 |
| CSF2 (-)                                             |  |  |  |  |  |  |  |  |  | 5 |
| Collagenase family (-)                               |  |  |  |  |  |  |  |  |  | 5 |
| AFP (-)                                              |  |  |  |  |  |  |  |  |  | 5 |
| Act (-)                                              |  |  |  |  |  |  |  |  |  | 5 |
| ABL1 (-)                                             |  |  |  |  |  |  |  |  |  | 5 |
| GLI1 (-)                                             |  |  |  |  |  |  |  |  |  | 5 |
| GDF2 (-)                                             |  |  |  |  |  |  |  |  |  | 5 |
| concanavalin a (-)                                   |  |  |  |  |  |  |  |  |  | 5 |
| benzyloxycarbonyl-Leu-Leu-Leu aldehyde (+)           |  |  |  |  |  |  |  |  |  | 5 |
| Wnt family Mm (-)                                    |  |  |  |  |  |  |  |  |  | 4 |
| TRIB3 (+)                                            |  |  |  |  |  |  |  |  |  | 4 |
| topotecan (-)                                        |  |  |  |  |  |  |  |  |  | 4 |
| TNFSF11 (-)                                          |  |  |  |  |  |  |  |  |  | 4 |
| THPO (-)                                             |  |  |  |  |  |  |  |  |  | 4 |
| TGFBR2 (-)                                           |  |  |  |  |  |  |  |  |  | 4 |
| SU6656 (+)                                           |  |  |  |  |  |  |  |  |  | 4 |
| sphingosine-1-phosphate (-)                          |  |  |  |  |  |  |  |  |  | 4 |
| sodium chloride (-)                                  |  |  |  |  |  |  |  |  |  | 4 |
| SNAI1 (+)                                            |  |  |  |  |  |  |  |  |  | 4 |
| RU486 (+)                                            |  |  |  |  |  |  |  |  |  | 4 |
| response to oxidative stress (-)                     |  |  |  |  |  |  |  |  |  | 4 |
| response to endoplasmic reticulum stress (-)         |  |  |  |  |  |  |  |  |  | 4 |
| response to DNA damage stimulus (-)                  |  |  |  |  |  |  |  |  |  | 4 |
| RAF1 (-)                                             |  |  |  |  |  |  |  |  |  | 4 |
| PTGS2 (-)                                            |  |  |  |  |  |  |  |  |  | 4 |
| prostaglandin E2 (-)                                 |  |  |  |  |  |  |  |  |  | 4 |
| Platelet Derived Growth Factor Complex family Hs (-) |  |  |  |  |  |  |  |  |  | 4 |
| phenylephrine (-)                                    |  |  |  |  |  |  |  |  |  | 4 |
| NTF3 (-)                                             |  |  |  |  |  |  |  |  |  | 4 |
| NRAS (-)                                             |  |  |  |  |  |  |  |  |  | 4 |
| NR5A2 (-)                                            |  |  |  |  |  |  |  |  |  | 4 |
| nifedipine (+)                                       |  |  |  |  |  |  |  |  |  | 4 |
| Luteinizing Hormone Complex Mm (-)                   |  |  |  |  |  |  |  |  |  | 4 |
| L-glutamic acid (-)                                  |  |  |  |  |  |  |  |  |  | 4 |
| leukotriene D4 (-)                                   |  |  |  |  |  |  |  |  |  | 4 |
| ischemia (-)                                         |  |  |  |  |  |  |  |  |  | 4 |
| INHBA (-)                                            |  |  |  |  |  |  |  |  |  | 4 |
| IL1B (-)                                             |  |  |  |  |  |  |  |  |  | 4 |
| hyperosmotic response (-)                            |  |  |  |  |  |  |  |  |  | 4 |
| hydrogen peroxide (-)                                |  |  |  |  |  |  |  |  |  | 4 |
| HTT (-)                                              |  |  |  |  |  |  |  |  |  | 4 |
| HIF (+)                                              |  |  |  |  |  |  |  |  |  | 4 |
| herbimycin (+)                                       |  |  |  |  |  |  |  |  |  | 4 |
| Gh (-)                                               |  |  |  |  |  |  |  |  |  | 4 |
| GCG (-)                                              |  |  |  |  |  |  |  |  |  | 4 |
| FOXL2 (-)                                            |  |  |  |  |  |  |  |  |  | 4 |
| forskolin (-)                                        |  |  |  |  |  |  |  |  |  | 4 |
| Fgf (-)                                              |  |  |  |  |  |  |  |  |  | 4 |
| ERK1/2 family (-)                                    |  |  |  |  |  |  |  |  |  | 4 |
| Erk family (-)                                       |  |  |  |  |  |  |  |  |  | 4 |
| electrical stimulus (-)                              |  |  |  |  |  |  |  |  |  | 4 |

Supplementary table 4 - Hypotheses common in ≥ 3 experiments (cont.)

|                                     |  |  |  |  |  |  |  |  |  |   |
|-------------------------------------|--|--|--|--|--|--|--|--|--|---|
| dimethyl sulfoxide (-)              |  |  |  |  |  |  |  |  |  | 4 |
| DCN (-)                             |  |  |  |  |  |  |  |  |  | 4 |
| Cytokine family (-)                 |  |  |  |  |  |  |  |  |  | 4 |
| cyclic AMP (-)                      |  |  |  |  |  |  |  |  |  | 4 |
| CREB1 (-)                           |  |  |  |  |  |  |  |  |  | 4 |
| complexOf(IL12A,IL12B) (+)          |  |  |  |  |  |  |  |  |  | 4 |
| Colforsin (-)                       |  |  |  |  |  |  |  |  |  | 4 |
| cold stimulus (-)                   |  |  |  |  |  |  |  |  |  | 4 |
| CHUK (-)                            |  |  |  |  |  |  |  |  |  | 4 |
| CEBPD (-)                           |  |  |  |  |  |  |  |  |  | 4 |
| calphostin C                        |  |  |  |  |  |  |  |  |  | 4 |
| bisphenol A (-)                     |  |  |  |  |  |  |  |  |  | 4 |
| BHLHE40 (+)                         |  |  |  |  |  |  |  |  |  | 4 |
| bexarotene (+)                      |  |  |  |  |  |  |  |  |  | 4 |
| beta-estradiol (-)                  |  |  |  |  |  |  |  |  |  | 4 |
| BDNF (-)                            |  |  |  |  |  |  |  |  |  | 4 |
| ANGPT2 (-)                          |  |  |  |  |  |  |  |  |  | 4 |
| Angiotensin ii (-)                  |  |  |  |  |  |  |  |  |  | 4 |
| Alpha catenin family (+)            |  |  |  |  |  |  |  |  |  | 4 |
| AKT3 (-)                            |  |  |  |  |  |  |  |  |  | 4 |
| A23187 (-)                          |  |  |  |  |  |  |  |  |  | 4 |
| 8-bromo-cAMP (-)                    |  |  |  |  |  |  |  |  |  | 4 |
| 3,3'-diindolylmethane (-)           |  |  |  |  |  |  |  |  |  | 4 |
| STAT1 (-)                           |  |  |  |  |  |  |  |  |  | 4 |
| Stanolone (-)                       |  |  |  |  |  |  |  |  |  | 4 |
| SB-431542 (+)                       |  |  |  |  |  |  |  |  |  | 4 |
| PROX1 (-)                           |  |  |  |  |  |  |  |  |  | 4 |
| propylthiouracil (-)                |  |  |  |  |  |  |  |  |  | 4 |
| PRL (-)                             |  |  |  |  |  |  |  |  |  | 4 |
| PARP9 (-)                           |  |  |  |  |  |  |  |  |  | 4 |
| neuron differentiation (+)          |  |  |  |  |  |  |  |  |  | 4 |
| HOXA13 (-)                          |  |  |  |  |  |  |  |  |  | 4 |
| GNAQ (-)                            |  |  |  |  |  |  |  |  |  | 4 |
| GNA14 (-)                           |  |  |  |  |  |  |  |  |  | 4 |
| FSHB (-)                            |  |  |  |  |  |  |  |  |  | 4 |
| cocaine (-)                         |  |  |  |  |  |  |  |  |  | 4 |
| NRG1 (-)                            |  |  |  |  |  |  |  |  |  | 3 |
| ZFP36 (+)                           |  |  |  |  |  |  |  |  |  | 3 |
| VEGFA (-)                           |  |  |  |  |  |  |  |  |  | 3 |
| tunicamycin (-)                     |  |  |  |  |  |  |  |  |  | 3 |
| TRH (-)                             |  |  |  |  |  |  |  |  |  | 3 |
| Tretinoin (-)                       |  |  |  |  |  |  |  |  |  | 3 |
| trapoxin (-)                        |  |  |  |  |  |  |  |  |  | 3 |
| TNF (-)                             |  |  |  |  |  |  |  |  |  | 3 |
| thapsigargin (-)                    |  |  |  |  |  |  |  |  |  | 3 |
| Tetradecanoylphorbol acetate (-)    |  |  |  |  |  |  |  |  |  | 3 |
| taurocholic acid (-)                |  |  |  |  |  |  |  |  |  | 3 |
| t(ZNF217) (+)                       |  |  |  |  |  |  |  |  |  | 3 |
| t(ZBTB17) (-)                       |  |  |  |  |  |  |  |  |  | 3 |
| sulindac sulfide (-)                |  |  |  |  |  |  |  |  |  | 3 |
| S-nitroso-N-acetylpenicillamine (-) |  |  |  |  |  |  |  |  |  | 3 |
| seizures (-)                        |  |  |  |  |  |  |  |  |  | 3 |
| response to osmotic stress (-)      |  |  |  |  |  |  |  |  |  | 3 |
| response to cold (-)                |  |  |  |  |  |  |  |  |  | 3 |
| RASSF1 (-)                          |  |  |  |  |  |  |  |  |  | 3 |
| quisqualic acid (-)                 |  |  |  |  |  |  |  |  |  | 3 |
| PTEN (+)                            |  |  |  |  |  |  |  |  |  | 3 |
| progesterone (-)                    |  |  |  |  |  |  |  |  |  | 3 |
| PRKCB (-)                           |  |  |  |  |  |  |  |  |  | 3 |

Supplementary table 4 - Hypotheses common in ≥ 3 experiments (cont.)

|                                                  |  |  |  |  |  |  |  |  |  |   |
|--------------------------------------------------|--|--|--|--|--|--|--|--|--|---|
| plicamycin (-)                                   |  |  |  |  |  |  |  |  |  | 3 |
| PKC Family Hs (-)                                |  |  |  |  |  |  |  |  |  | 3 |
| PKA family Rn (-)                                |  |  |  |  |  |  |  |  |  | 3 |
| palmitic acid (-)                                |  |  |  |  |  |  |  |  |  | 3 |
| Oxidopamine (-)                                  |  |  |  |  |  |  |  |  |  | 3 |
| oxidative stress (-)                             |  |  |  |  |  |  |  |  |  | 3 |
| OSM (-)                                          |  |  |  |  |  |  |  |  |  | 3 |
| nicotine (-)                                     |  |  |  |  |  |  |  |  |  | 3 |
| MYC (+)                                          |  |  |  |  |  |  |  |  |  | 3 |
| monocyte adherence (-)                           |  |  |  |  |  |  |  |  |  | 3 |
| MEOX2 (-)                                        |  |  |  |  |  |  |  |  |  | 3 |
| lysophosphatidic acid (-)                        |  |  |  |  |  |  |  |  |  | 3 |
| L-triiodothyronine (-)                           |  |  |  |  |  |  |  |  |  | 3 |
| LTBR (-)                                         |  |  |  |  |  |  |  |  |  | 3 |
| low calorie diet (+)                             |  |  |  |  |  |  |  |  |  | 3 |
| KRAS (-)                                         |  |  |  |  |  |  |  |  |  | 3 |
| KLF7 (-)                                         |  |  |  |  |  |  |  |  |  | 3 |
| JAK1 (-)                                         |  |  |  |  |  |  |  |  |  | 3 |
| IRF5 (-)                                         |  |  |  |  |  |  |  |  |  | 3 |
| insulin (-)                                      |  |  |  |  |  |  |  |  |  | 3 |
| immobilization stress (-)                        |  |  |  |  |  |  |  |  |  | 3 |
| IKK family Hs (-)                                |  |  |  |  |  |  |  |  |  | 3 |
| IKBKB (-)                                        |  |  |  |  |  |  |  |  |  | 3 |
| IFNG (-)                                         |  |  |  |  |  |  |  |  |  | 3 |
| hypoxia (-)                                      |  |  |  |  |  |  |  |  |  | 3 |
| hyperoxia (-)                                    |  |  |  |  |  |  |  |  |  | 3 |
| histamine (-)                                    |  |  |  |  |  |  |  |  |  | 3 |
| high frequency electrical stimulus (-)           |  |  |  |  |  |  |  |  |  | 3 |
| Helicobacter pylori infection (-)                |  |  |  |  |  |  |  |  |  | 3 |
| heat shock (-)                                   |  |  |  |  |  |  |  |  |  | 3 |
| GSK3B (-)                                        |  |  |  |  |  |  |  |  |  | 3 |
| FOXO1 (-)                                        |  |  |  |  |  |  |  |  |  | 3 |
| FGFR1 (-)                                        |  |  |  |  |  |  |  |  |  | 3 |
| FGF2 (-)                                         |  |  |  |  |  |  |  |  |  | 3 |
| experimentally-induced arthritis (-)             |  |  |  |  |  |  |  |  |  | 3 |
| ERK family (-)                                   |  |  |  |  |  |  |  |  |  | 3 |
| EPO (-)                                          |  |  |  |  |  |  |  |  |  | 3 |
| ELAVL1 (-)                                       |  |  |  |  |  |  |  |  |  | 3 |
| darkness (-)                                     |  |  |  |  |  |  |  |  |  | 3 |
| cycloheximide (-)                                |  |  |  |  |  |  |  |  |  | 3 |
| CTGF (-)                                         |  |  |  |  |  |  |  |  |  | 3 |
| CP-31398 (-)                                     |  |  |  |  |  |  |  |  |  | 3 |
| colchicine (-)                                   |  |  |  |  |  |  |  |  |  | 3 |
| cell senescence (-)                              |  |  |  |  |  |  |  |  |  | 3 |
| CEBPB (-)                                        |  |  |  |  |  |  |  |  |  | 3 |
| BRMS1 (-)                                        |  |  |  |  |  |  |  |  |  | 3 |
| BMPRI1B (+)                                      |  |  |  |  |  |  |  |  |  | 3 |
| bacterial infection (-)                          |  |  |  |  |  |  |  |  |  | 3 |
| ATF4 (-)                                         |  |  |  |  |  |  |  |  |  | 3 |
| AREG (-)                                         |  |  |  |  |  |  |  |  |  | 3 |
| arachidonic acid (-)                             |  |  |  |  |  |  |  |  |  | 3 |
| APOE (+)                                         |  |  |  |  |  |  |  |  |  | 3 |
| AP-1 complex Hs (-)                              |  |  |  |  |  |  |  |  |  | 3 |
| aldosterone (-)                                  |  |  |  |  |  |  |  |  |  | 3 |
| AGN194204 (-)                                    |  |  |  |  |  |  |  |  |  | 3 |
| AGN193109 (+)                                    |  |  |  |  |  |  |  |  |  | 3 |
| 6-cyano-7-nitroquinoxaline-2,3-dione (+)         |  |  |  |  |  |  |  |  |  | 3 |
| 2-cyano-3,12-dioxoolean-1,9-dien-28-oic acid (-) |  |  |  |  |  |  |  |  |  | 3 |
| 15-deoxy-delta-12,14 -PGJ 2 (-)                  |  |  |  |  |  |  |  |  |  | 3 |

Supplementary table 4 - Hypotheses common in ≥ 3 experiments (cont.)

|                                                                           |  |  |  |  |  |  |  |  |  |   |
|---------------------------------------------------------------------------|--|--|--|--|--|--|--|--|--|---|
| (4-amino-1,4-dihydro-3-(2-pyridyl)-5-thioxo-1,2,4-triazole)copper(II) (-) |  |  |  |  |  |  |  |  |  | 3 |
| (±)-AMPA (-)                                                              |  |  |  |  |  |  |  |  |  | 3 |
| urethane (+)                                                              |  |  |  |  |  |  |  |  |  | 3 |
| troglitazone (-)                                                          |  |  |  |  |  |  |  |  |  | 3 |
| TNFSF10 (-)                                                               |  |  |  |  |  |  |  |  |  | 3 |
| TGFA (-)                                                                  |  |  |  |  |  |  |  |  |  | 3 |
| SREBF2 (-)                                                                |  |  |  |  |  |  |  |  |  | 3 |
| SREBF1 (-)                                                                |  |  |  |  |  |  |  |  |  | 3 |
| SRC (-)                                                                   |  |  |  |  |  |  |  |  |  | 3 |
| SP1 (-)                                                                   |  |  |  |  |  |  |  |  |  | 3 |
| SOCS3 (+)                                                                 |  |  |  |  |  |  |  |  |  | 3 |
| SMAD4 (-)                                                                 |  |  |  |  |  |  |  |  |  | 3 |
| S100B (-)                                                                 |  |  |  |  |  |  |  |  |  | 3 |
| RARB (-)                                                                  |  |  |  |  |  |  |  |  |  | 3 |
| RAR Family Hs (-)                                                         |  |  |  |  |  |  |  |  |  | 3 |
| pulmonary fibrosis (+)                                                    |  |  |  |  |  |  |  |  |  | 3 |
| prednisolone (-)                                                          |  |  |  |  |  |  |  |  |  | 3 |
| NEUROG3 (-)                                                               |  |  |  |  |  |  |  |  |  | 3 |
| NADPH oxidase complex Mm (+)                                              |  |  |  |  |  |  |  |  |  | 3 |
| MYF5 (-)                                                                  |  |  |  |  |  |  |  |  |  | 3 |
| IFNA2 (-)                                                                 |  |  |  |  |  |  |  |  |  | 3 |
| heat (+)                                                                  |  |  |  |  |  |  |  |  |  | 3 |
| GAST (-)                                                                  |  |  |  |  |  |  |  |  |  | 3 |
| fusionOf(Ret,Ncoa4) (-)                                                   |  |  |  |  |  |  |  |  |  | 3 |
| FAS (+)                                                                   |  |  |  |  |  |  |  |  |  | 3 |
| EGR2 (-)                                                                  |  |  |  |  |  |  |  |  |  | 3 |
| E. coli B4 lipopolysaccharide (-)                                         |  |  |  |  |  |  |  |  |  | 3 |
| CXCR7 (+)                                                                 |  |  |  |  |  |  |  |  |  | 3 |
| CREBBP (-)                                                                |  |  |  |  |  |  |  |  |  | 3 |
| cis-urocanic acid (-)                                                     |  |  |  |  |  |  |  |  |  | 3 |
| CAMK4 (-)                                                                 |  |  |  |  |  |  |  |  |  | 3 |
| BTC (-)                                                                   |  |  |  |  |  |  |  |  |  | 3 |
| BMP7 (-)                                                                  |  |  |  |  |  |  |  |  |  | 3 |
| BMP4 (-)                                                                  |  |  |  |  |  |  |  |  |  | 3 |
| AHR (-)                                                                   |  |  |  |  |  |  |  |  |  | 3 |
| ADIPOQ (-)                                                                |  |  |  |  |  |  |  |  |  | 3 |
